# Supplementary material
Source: PubMed Central journal article supplement (PMC3797453)
Supplement: Supp_Fig1.pdf [file Supp_Fig1.pdf]

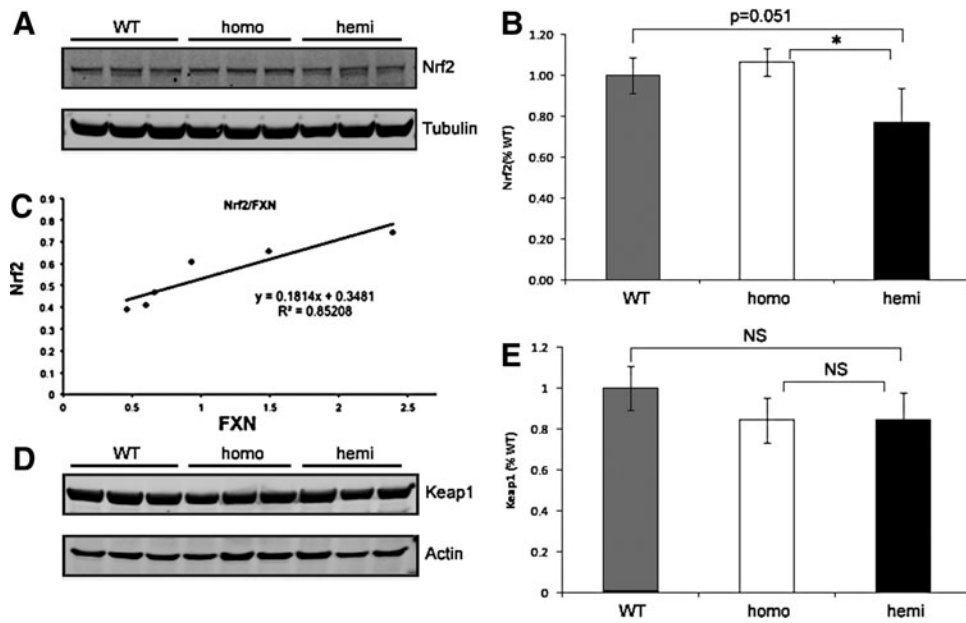

**SUPPLEMENTARY FIG. S1.** Nrf2 is also decreased in the cerebella of YG8 mice. (A, B) Nrf2 expression in cerebellar tissue is significantly decreased in hemizygous mice, 3 mice/group,  $*p < 0.05$ , one-tailed *t*-test. (C) Frataxin transcript levels are significantly correlated with the Nrf2 transcript levels in the cerebella,  $R^2 = 0.85$ ,  $p < 0.05$ . (D, E) Keap1 does not change in the dorsal root ganglion of YG8 mice. Nrf2, nuclear factor-E2-related factor-2; WT, wild type; NS, non-significant.
