# Supplementary material
Source: PubMed Central journal article supplement (PMC3797453)
Supplement: Supp_Fig2.pdf [file Supp_Fig2.pdf]

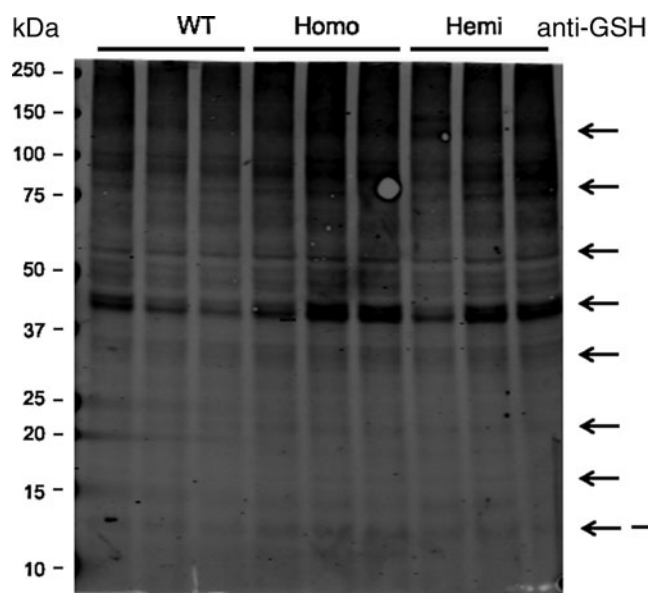

**SUPPLEMENTARY FIG. S2.** Increased protein glutathionylation in the YG8R mutant cerebella *versus* controls. About 30  $\mu$ g protein was separated on the Bis-Tris gels and transferred to nitrocellulose. Glutathione-protein conjugates were probed by an anti-GSH antibody.
