# Supplementary material
Source: PubMed Central journal article supplement (PMC3797453)
Supplement: Supp_Fig3.pdf [file Supp_Fig3.pdf]

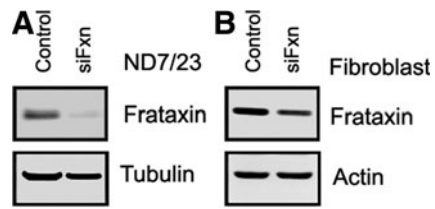

**SUPPLEMENTARY FIG. S3. Short inhibitory RNA directed against frataxin reduces frataxin protein expression in cells.** (A) Frataxin siRNA efficiently knocks down frataxin expression in ND7/23 cells. Control: control siRNA smart-pool. siFxn, rat frataxin siRNA. (B) Frataxin siRNA knocks down frataxin expression in Fibroblast GM02153. Control: Allstar-negative siRNA, siFxn, frataxin siRNA A11.
