# Supplementary material
Source: PubMed Central journal article supplement (PMC3797453)
Supplement: Supp_Table1.pdf [file Supp_Table1.pdf]

SUPPLEMENTARY TABLE S1. PRIMERS USED FOR QUANTITATIVE REAL-TIME-PCR

| <i>Gene</i>   | <i>Forward primer</i>   | <i>Reverse primer</i>     |
|---------------|-------------------------|---------------------------|
| <i>Cat</i>    | AGCGACCAGATGAAGCAGTG    | TCCGCTCTCTGTCAAAGTGTG     |
| <i>FXN</i>    | CTGGCTATCTTCTCCATCCAG   | AGCATCTTTTCCGGAATAGGC     |
| <i>Gapdh</i>  | CCCCTGGCCAAGGTCATCCATG  | CAGTGAGCTTCCCGTTCAGCTC    |
| <i>Hmox</i>   | GCATGCCCCAGGATTTGTC     | GACCCCTTCTGAAAGTTCTTCATG  |
| <i>Kif1b</i>  | ACGCGGATTCTGATAGCGG     | GAGGCCACACTTTTTAACAATGG   |
| <i>Kif5b</i>  | GCCGAGTGCAACATCAAGTG    | CATAAGGCTTGGACGCGATCA     |
| <i>Lmnb1</i>  | GAGTATGAGGCGGCACTAAAC   | CATCTGCTAACTGCTTTTTGGC    |
| <i>Nqo1</i>   | AGGATGGGAGGTACTCGAATC   | TGGGAAGTCAAATATCACCAGGT   |
| <i>Nrf2</i>   | TTTTCCATTCCC GAATTACAGT | GGAGATCGATGAGTAAAAATGGT   |
| <i>Prdx2</i>  | GGCAACGCGCAAATCGGAAAG   | TCCAGTGGGTAGAAAAAGAGGA    |
| <i>Prdx3</i>  | TTAGCACCAGTTCTCTTTCCA   | CCCTTAAAGTCGTCGAGACTCAG   |
| <i>Sod1</i>   | AACCAGTTGTGTTGTCAGGAC   | CCACCATGTTTCTTAGAGTGAGG   |
| <i>Sod2</i>   | CAGACCTGCCTTACGACTATGG  | CTCGGTGGCGTTGAGATTGTT     |
| <i>Txn2</i>   | TGGGCTTCCCTCACCTCTAAG   | CCTGGACGTTAAAGGTCGTCA     |
| <i>Txnip</i>  | TCTTTTGAGGTGGTCTTCAACG  | GCTTTGACTCGGGTAACTTCACA   |
| <i>Gclc</i>   | CTACCACGCAGTCAAGGACC    | CCTCCATCAGTAACAACCTGGAC   |
| <i>Gclm</i>   | CTTCGCCTCCGATTGAAGATG   | AAAGGCAGTCAAATCTGGTGG     |
| <i>TxnRD1</i> | GCTCGGACAAGCTCTGAAAGA   | GGAACCGCTCTGCTGAATAGAT    |
| <i>Mbp</i>    | GCTCCCTGCCCCAGAAGT      | TGTCACAATGTTCTTGAAGAAATGG |

Cat, catalase; Fxn, frataxin; Gclc, glutamate–cysteine ligase, catalytic subunit; Gclm, glutamate–cysteine ligase, modifier subunit; Hmox, heme oxygenase; Kif1b, kinesin family member 1B; Kif5b, kinesin family member 5B; Mbp, myelin basic protein; Nqo1, NAD(P)H dehydrogenase, quinone 1; Nrf2, nuclear factor-E2-related factor-2; Prdx2, peroxiredoxin 2; Prdx3, peroxiredoxin 3; Sod1, Cu/Zn superoxide dismutase; Sod2, Mn superoxide dismutase; Txn2, thioredoxin 2; Txnip, thioredoxin-interacting protein; TxnRD1, thioredoxin reductase 1.
