# Supplementary material
Source: PubMed Central journal article supplement (PMC3797453)
Supplement: Supp_Table2.pdf [file Supp_Table2.pdf]

SUPPLEMENTARY TABLE S2. siRNA USED IN THIS STUDY

| <i>siRNA name</i>             | <i>siRNA sequence</i>                                                                    |
|-------------------------------|------------------------------------------------------------------------------------------|
| sifxn A02                     | UCUCUAGAUGAGACCACCUAUGAAA                                                                |
| sifxn A09                     | CCUUGCAGACAAGCCAUACACGUUU                                                                |
| sifxn A11                     | CCAAACAAGCAAUCUGGCUAUCUU                                                                 |
| Rat On-Target SMARTpool sifxn | CGCUAUGACUGGACCGGGA<br>CCAUUAAGCUGGGCGGAGA<br>AUGAAAGACUUGC GAAGA<br>GGACCUAUGUGAUCAACAA |
